# Supplementary material for: Cell cycle block by p53 activation reduces SARS-CoV-2 release in infected alveolar basal epithelial A549-hACE2 cells
Source: Frontiers journal article supplement (doi:10.3389/fphar.2022.1018761), 2022-12-13

## Raw Data

Row images from the Western blotting experiments presented in **Figure 3**.

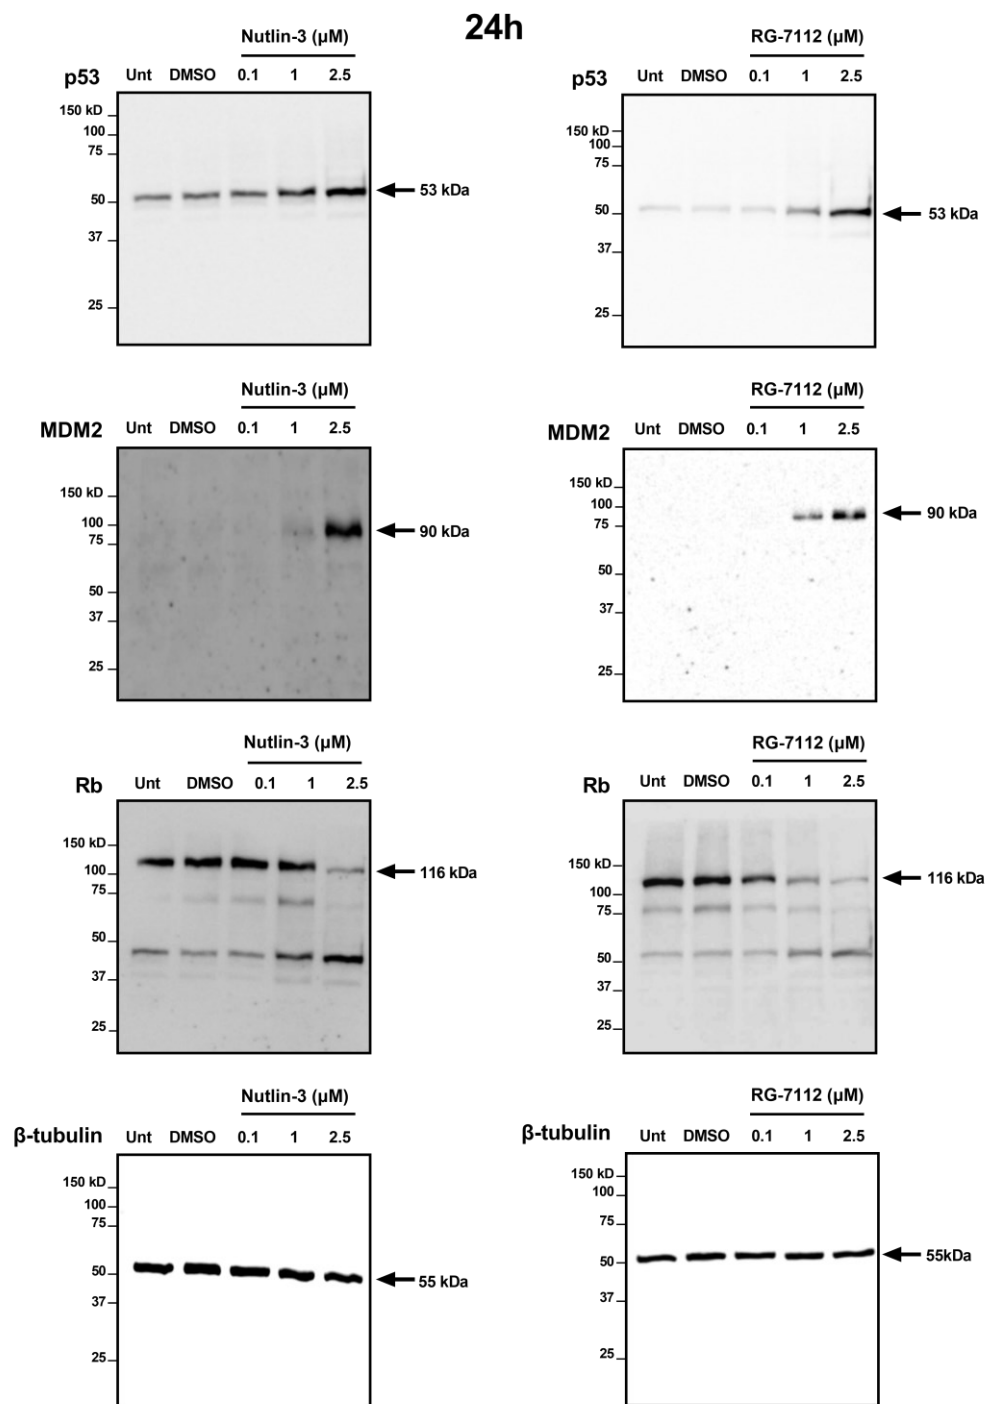

## SARS-CoV-2

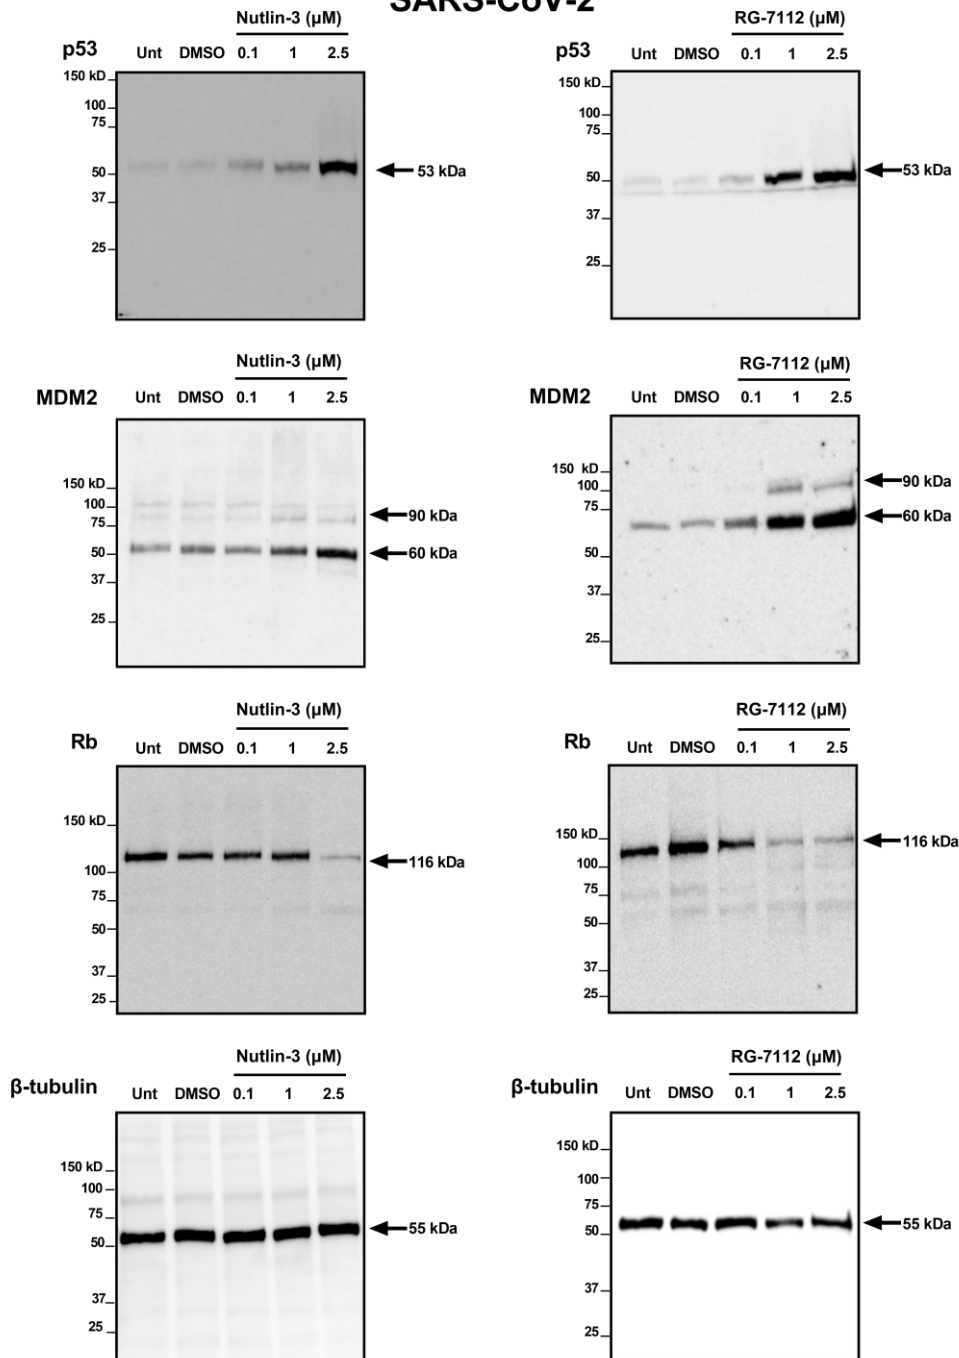

# Mock

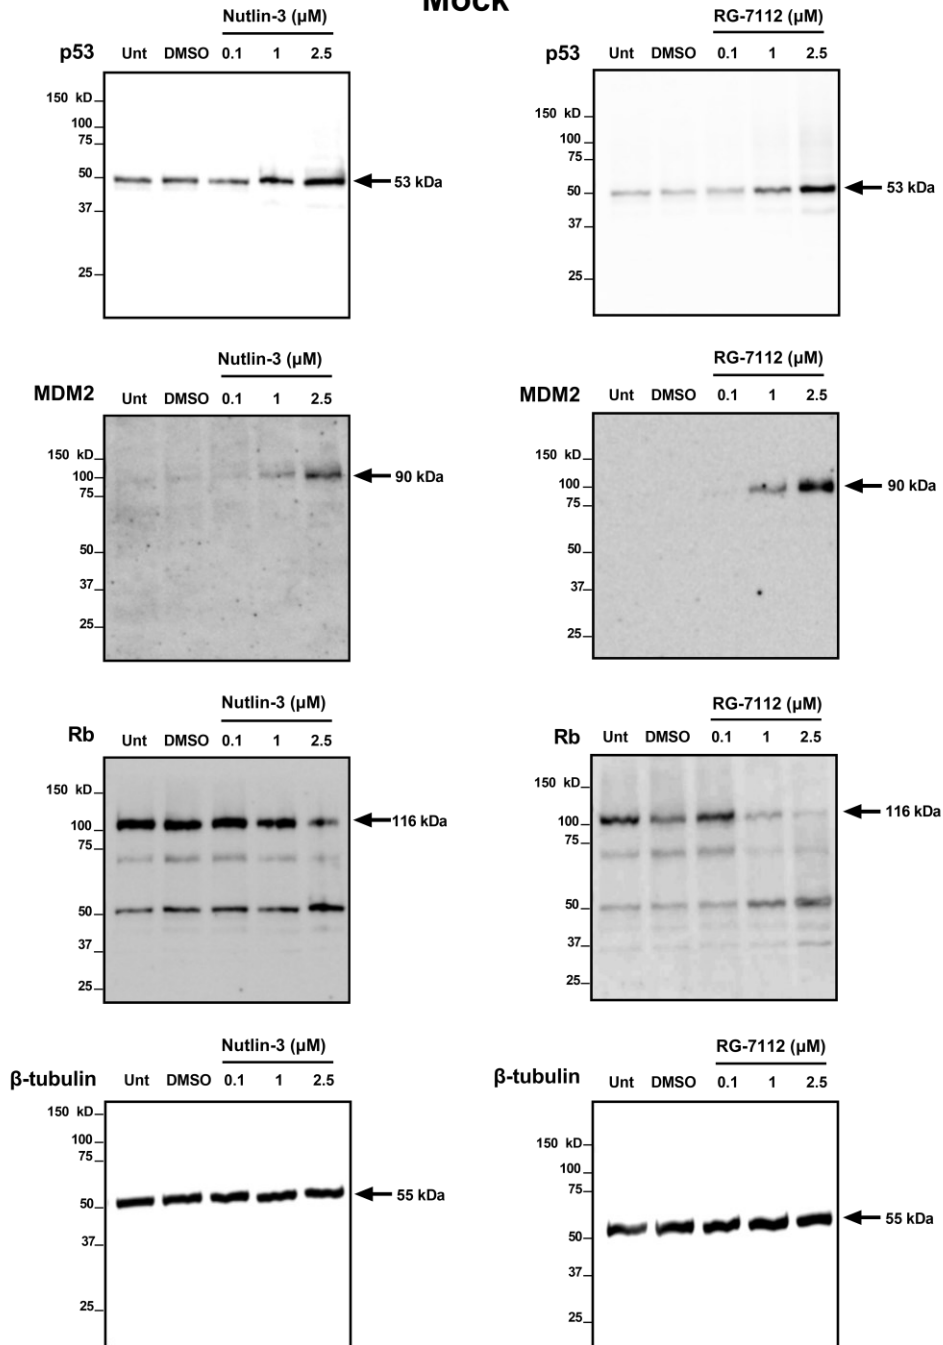

Supplement: Data_Sheet_1.PDF [file Data_Sheet_1.PDF]
